# Supplementary material for: Assessor burden, inter-rater agreement and user experience of the RoB-SPEO tool for assessing risk of bias in studies estimating prevalence of exposure to occupational risk factors: An analysis from the WHO/ILO Joint Estimates of the Work-related Burden of Disease and Injury
Source: PubMed Central journal article supplement — Environ Int. 2022 Jan;158:107005. doi: 10.1016/j.envint.2021.107005 (PMC8685606; doi:10.1016/j.envint.2021.107005), 2022-01
Supplement: mmc1.pdf [file mmc1.pdf]

**Appendix 1. Innovations introduced between RoB-SPEO version 4 and RoB-SPEO version 6**

| <b>Stage</b>                                                                                                                                                                                        | <b>Main innovations introduced</b>                                                                                                                                                                                                                                                        |
|-----------------------------------------------------------------------------------------------------------------------------------------------------------------------------------------------------|-------------------------------------------------------------------------------------------------------------------------------------------------------------------------------------------------------------------------------------------------------------------------------------------|
| One round of feedback on RoB-SPEO version 4 received from pilot testers and integrated in RoB-SPEO version.5                                                                                        | <ul style="list-style-type: none"><li>• Introduced additional domain on bias due to differences in numerator and denominator</li><li>• Introduced standard tables for reporting assessments by domain</li><li>• Introduced new rating category (“No information”)</li></ul>               |
| Feedback on RoB-SPEO version 5 received from two external systematic review methodologists, four peer reviewers and a journal editor and integrated in RoB-SPEO version 6 presented in this article | <ul style="list-style-type: none"><li>• Re-formatted tool for clarity, introducing subheadings to differentiate components</li><li>• In the tables for reporting assessments by domain, added reporting of data extracted from study records to support assessments and ratings</li></ul> |
