# Supplementary material for: Assessor burden, inter-rater agreement and user experience of the RoB-SPEO tool for assessing risk of bias in studies estimating prevalence of exposure to occupational risk factors: An analysis from the WHO/ILO Joint Estimates of the Work-related Burden of Disease and Injury
Source: PubMed Central journal article supplement — Environ Int. 2022 Jan;158:107005. doi: 10.1016/j.envint.2021.107005 (PMC8685606; doi:10.1016/j.envint.2021.107005), 2022-01
Supplement: mmc2.pdf [file mmc2.pdf]

Appendix 2. Ratings assigned using RoB-SPEO for all study records

| Assessor            | Study    | Time taken (minutes) | Risk of bias ratings |               |               |               |               |               |               |               |
|---------------------|----------|----------------------|----------------------|---------------|---------------|---------------|---------------|---------------|---------------|---------------|
|                     |          |                      | Domain 1             | Domain 2      | Domain 3      | Domain 4      | Domain 5      | Domain 6      | Domain 7      | Domain 8      |
| Study 1_Reviewer 1  | Study 1  | 240                  | LOW                  | PROBABLY LOW  | LOW           | PROBABLY LOW  | PROBABLY HIGH | LOW           | LOW           | PROBABLY HIGH |
| Study 1_Reviewer 2  | Study 1  | 120                  | LOW                  | PROBABLY LOW  | LOW           | PROBABLY LOW  | PROBABLY HIGH | LOW           | LOW           | LOW           |
| Study 2_Reviewer 1  | Study 2  | 32                   | PROBABLY HIGH        | LOW           | PROBABLY HIGH | PROBABLY LOW  | PROBABLY LOW  | PROBABLY LOW  | LOW           | PROBABLY LOW  |
| Study 2_Reviewer 2  | Study 2  | 57                   | PROBABLY LOW         | LOW           | LOW           | PROBABLY LOW  | PROBABLY LOW  | LOW           | HIGH          | LOW           |
| Study 3_Reviewer 1  | Study 3  | 180                  | PROBABLY HIGH        | PROBABLY LOW  | LOW           | LOW           | LOW           | LOW           | LOW           | LOW           |
| Study 3_Reviewer 2  | Study 3  | 120                  | PROBABLY HIGH        | PROBABLY LOW  | LOW           | LOW           | LOW           | LOW           | LOW           | LOW           |
| Study 4_Reviewer 1  | Study 4  | 130                  | LOW                  | LOW           | PROBABLY LOW  | PROBABLY LOW  | PROBABLY LOW  | LOW           | LOW           | HIGH          |
| Study 4_Reviewer 2  | Study 4  | 120                  | LOW                  | LOW           | PROBABLY LOW  | PROBABLY LOW  | HIGH          | LOW           | LOW           | LOW           |
| Study 5_Reviewer 1  | Study 5  | 180                  | PROBABLY LOW         | PROBABLY LOW  | PROBABLY LOW  | PROBABLY LOW  | LOW           | PROBABLY LOW  | PROBABLY LOW  | LOW           |
| Study 5_Reviewer 2  | Study 5  | 120                  | PROBABLY LOW         | PROBABLY LOW  | PROBABLY LOW  | PROBABLY LOW  | LOW           | PROBABLY LOW  | PROBABLY LOW  | LOW           |
| Study 6_Reviewer 1  | Study 6  | 19                   | PROBABLY LOW         | LOW           | LOW           | PROBABLY LOW  | LOW           | LOW           |               | LOW           |
| Study 6_Reviewer 2  | Study 6  | 59                   | LOW                  | LOW           | LOW           | LOW           | PROBABLY LOW  | LOW           | PROBABLY LOW  | LOW           |
| Study 7_Reviewer 1  | Study 7  | 120                  | LOW                  | LOW           | LOW           | LOW           | LOW           | PROBABLY HIGH | LOW           | LOW           |
| Study 7_Reviewer 2  | Study 7  | 90                   | LOW                  | LOW           | LOW           | LOW           | LOW           | PROBABLY HIGH | LOW           | LOW           |
| Study 8_Reviewer 1  | Study 8  | 59                   | PROBABLY HIGH        | LOW           | LOW           | PROBABLY LOW  | PROBABLY LOW  | PROBABLY LOW  | PROBABLY LOW  | HIGH          |
| Study 8_Reviewer 2  | Study 8  | 65                   | HIGH                 | LOW           | PROBABLY HIGH | PROBABLY HIGH | PROBABLY LOW  | LOW           | PROBABLY LOW  | LOW           |
| Study 9_Reviewer 1  | Study 9  | 180                  | PROBABLY HIGH        | PROBABLY LOW  | PROBABLY HIGH | LOW           |
| Study 9_Reviewer 2  | Study 9  | 120                  | PROBABLY HIGH        | PROBABLY LOW  | PROBABLY HIGH | LOW           |
| Study 10_Reviewer 1 | Study 10 | 150                  | PROBABLY LOW         | PROBABLY LOW  | PROBABLY LOW  | LOW           | PROBABLY LOW  | LOW           | PROBABLY LOW  | LOW           |
| Study 10_Reviewer 2 | Study 10 | 180                  | PROBABLY LOW         | PROBABLY LOW  | PROBABLY LOW  | LOW           | PROBABLY LOW  | LOW           | PROBABLY LOW  | LOW           |
| Study 11_Reviewer 1 | Study 11 | 150                  | LOW                  | LOW           | LOW           | LOW           | LOW           | PROBABLY HIGH | LOW           | LOW           |
| Study 11_Reviewer 2 | Study 11 | 120                  | LOW                  | LOW           | LOW           | LOW           | LOW           | PROBABLY HIGH | LOW           | LOW           |
| Study 12_Reviewer 1 | Study 12 | 180                  | LOW                  | LOW           | PROBABLY LOW  | PROBABLY HIGH | HIGH          | LOW           | PROBABLY HIGH | LOW           |
| Study 12_Reviewer 2 | Study 12 | 240                  | LOW                  | LOW           | PROBABLY LOW  | PROBABLY HIGH | HIGH          | LOW           | PROBABLY HIGH | LOW           |
| Study 13_Reviewer 1 | Study 13 | 72                   | PROBABLY HIGH        | LOW           | HIGH          | PROBABLY LOW  | PROBABLY LOW  | PROBABLY HIGH | PROBABLY LOW  | LOW           |
| Study 13_Reviewer 2 | Study 13 | 67                   | HIGH                 | LOW           | PROBABLY HIGH | LOW           | PROBABLY LOW  | PROBABLY LOW  | PROBABLY LOW  | LOW           |
| Study 14_Reviewer 1 | Study 14 | 180                  | PROBABLY LOW         | PROBABLY LOW  | PROBABLY HIGH | PROBABLY HIGH | PROBABLY HIGH | LOW           | LOW           | HIGH          |
| Study 14_Reviewer 2 | Study 14 | 180                  | PROBABLY LOW         | PROBABLY LOW  | PROBABLY HIGH | PROBABLY HIGH | PROBABLY HIGH | LOW           | LOW           | LOW           |
| Study 15_Reviewer 1 | Study 15 | 75                   | HIGH                 | LOW           | HIGH          | HIGH          | PROBABLY LOW  | PROBABLY LOW  | LOW           | LOW           |
| Study 15_Reviewer 2 | Study 15 | 48                   | PROBABLY LOW         | LOW           | LOW           | PROBABLY LOW  | PROBABLY LOW  | LOW           | NOT REPORTED  | LOW           |
| Study 16_Reviewer 1 | Study 16 | 33                   | PROBABLY LOW         | PROBABLY LOW  | PROBABLY LOW  | PROBABLY LOW  | PROBABLY LOW  | LOW           | PROBABLY LOW  | PROBABLY LOW  |
| Study 16_Reviewer 2 | Study 16 | 36                   | PROBABLY HIGH        | PROBABLY HIGH | PROBABLY LOW  | LOW           | PROBABLY HIGH | LOW           | PROBABLY LOW  | LOW           |
| Study 17_Reviewer 1 | Study 17 | 28                   | LOW                  | NOT REPORTED  | LOW           | PROBABLY HIGH | PROBABLY HIGH | LOW           | LOW           | PROBABLY LOW  |
| Study 17_Reviewer 2 | Study 17 | 75                   | LOW                  | NOT REPORTED  | PROBABLY HIGH | PROBABLY LOW  | PROBABLY LOW  | LOW           | LOW           | PROBABLY LOW  |
| Study 18_Reviewer 1 | Study 18 | 49                   | HIGH                 | LOW           | PROBABLY LOW  | PROBABLY HIGH | PROBABLY LOW  | PROBABLY LOW  | NOT REPORTED  | LOW           |
| Study 18_Reviewer 2 | Study 18 | 34                   | NOT REPORTED         | LOW           | LOW           | PROBABLY LOW  | PROBABLY LOW  | PROBABLY LOW  | NOT REPORTED  | LOW           |
| Study 19_Reviewer 1 | Study 19 | 58                   | PROBABLY HIGH        | LOW           | PROBABLY LOW  | LOW           | PROBABLY LOW  | LOW           | PROBABLY LOW  | PROBABLY LOW  |
| Study 19_Reviewer 2 | Study 19 | 65                   | PROBABLY HIGH        | PROBABLY LOW  | LOW           | PROBABLY LOW  | PROBABLY LOW  | PROBABLY LOW  | PROBABLY LOW  | LOW           |
| Study 20_Reviewer 1 | Study 20 | 59                   | PROBABLY HIGH        | PROBABLY LOW  | PROBABLY HIGH | PROBABLY LOW  | PROBABLY LOW  | PROBABLY LOW  | LOW           | LOW           |
| Study 20_Reviewer 2 | Study 20 | 37                   | LOW                  | LOW           | LOW           | PROBABLY LOW  | PROBABLY LOW  | LOW           | LOW           | PROBABLY LOW  |
| Study 21_Reviewer 1 | Study 21 | 92                   | PROBABLY LOW         | LOW           | PROBABLY HIGH | LOW           | PROBABLY LOW  | PROBABLY LOW  | LOW           | LOW           |
| Study 21_Reviewer 2 | Study 21 | 31                   | LOW                  | LOW           | PROBABLY LOW  | LOW           | PROBABLY LOW  | LOW           | LOW           | LOW           |
| Study 22_Reviewer 1 | Study 22 | 72                   | PROBABLY HIGH        | LOW           | PROBABLY LOW  | LOW           | PROBABLY LOW  | PROBABLY LOW  | LOW           | LOW           |

Strictly confidential – Do not share

|                     |          |     |               |               |               |               |               |               |               |               |
|---------------------|----------|-----|---------------|---------------|---------------|---------------|---------------|---------------|---------------|---------------|
| Study 22_Reviewer 2 | Study 22 | 53  | PROBABLY HIGH | LOW           | LOW           | PROBABLY HIGH | PROBABLY LOW  | PROBABLY LOW  | NOT REPORTED  | LOW           |
| Study 23_Reviewer 1 | Study 23 | 40  | HIGH          | LOW           | PROBABLY LOW  | PROBABLY LOW  | PROBABLY LOW  | LOW           | LOW           | LOW           |
| Study 23_Reviewer 2 | Study 23 | 22  | PROBABLY LOW  | LOW           | LOW           | PROBABLY LOW  | PROBABLY LOW  | PROBABLY LOW  | NOT REPORTED  | LOW           |
| Study 24_Reviewer 1 | Study 24 | 87  | LOW           | LOW           | PROBABLY LOW  | PROBABLY LOW  | PROBABLY LOW  | PROBABLY LOW  | LOW           | LOW           |
| Study 24_Reviewer 2 | Study 24 | 51  | LOW           | LOW           | LOW           | LOW           | LOW           | PROBABLY LOW  | LOW           | LOW           |
| Study 25_Reviewer 1 | Study 25 | 52  | PROBABLY HIGH | LOW           | LOW           | LOW           | PROBABLY LOW  | LOW           | LOW           | LOW           |
| Study 25_Reviewer 2 | Study 25 | 41  | PROBABLY LOW  | LOW           | LOW           | LOW           | PROBABLY LOW  | PROBABLY LOW  | NOT REPORTED  | LOW           |
| Study 26_Reviewer 1 | Study 26 | 30  | PROBABLY HIGH | Probably LOW  | LOW           | LOW           | LOW           | PROBABLY LOW  | LOW           | PROBABLY LOW  |
| Study 26_Reviewer 2 | Study 26 | 13  | PROBABLY HIGH | LOW           | PROBABLY HIGH | LOW           | PROBABLY LOW  | LOW           | LOW           | LOW           |
| Study 27_Reviewer 1 | Study 27 | 90  | PROBABLY HIGH | PROBABLY LOW  | PROBABLY HIGH | PROBABLY HIGH | PROBABLY HIGH | LOW           | LOW           | LOW           |
| Study 27_Reviewer 2 | Study 27 | 120 | PROBABLY HIGH | PROBABLY LOW  | PROBABLY HIGH | PROBABLY HIGH | PROBABLY HIGH | LOW           | LOW           | LOW           |
| Study 28_Reviewer 1 | Study 28 | 180 | HIGH          | PROBABLY LOW  | PROBABLY HIGH | PROBABLY HIGH | PROBABLY HIGH | LOW           | HIGH          | PROBABLY HIGH |
| Study 28_Reviewer 2 | Study 28 | 180 | HIGH          | PROBABLY LOW  | PROBABLY HIGH | PROBABLY HIGH | PROBABLY HIGH | LOW           | HIGH          | LOW           |
| Study 29_Reviewer 1 | Study 29 | 180 | PROBABLY HIGH | PROBABLY HIGH | LOW           | LOW           | LOW           | LOW           | LOW           | LOW           |
| Study 29_Reviewer 2 | Study 29 | 120 | PROBABLY HIGH | LOW           |
| Study 30_Reviewer 1 | Study 30 | 120 | PROBABLY HIGH | PROBABLY LOW  | LOW           | LOW           | LOW           | PROBABLY LOW  | LOW           | LOW           |
| Study 30_Reviewer 2 | Study 30 | 180 | PROBABLY HIGH | PROBABLY LOW  | LOW           | LOW           | LOW           | PROBABLY LOW  | LOW           | LOW           |
| Study 31_Reviewer 1 | Study 31 | 82  | HIGH          | PROBABLY LOW  | PROBABLY LOW  | PROBABLY HIGH | NOT REPORTED  | PROBABLY LOW  | NOT REPORTED  | LOW           |
| Study 31_Reviewer 2 | Study 31 | 47  | PROBABLY LOW  | LOW           | LOW           | NOT REPORTED  | PROBABLY LOW  | LOW           | NOT REPORTED  | LOW           |
| Study 32_Reviewer 1 | Study 32 | 90  | PROBABLY HIGH | LOW           | LOW           | LOW           | LOW           | PROBABLY HIGH | LOW           | LOW           |
| Study 32_Reviewer 2 | Study 32 | 120 | PROBABLY HIGH | LOW           | LOW           | LOW           | LOW           | PROBABLY HIGH | LOW           | LOW           |
| Study 33_Reviewer 1 | Study 33 | 180 | PROBABLY HIGH | PROBABLY LOW  | LOW           | PROBABLY HIGH | PROBABLY HIGH | PROBABLY LOW  | HIGH          | LOW           |
| Study 33_Reviewer 2 | Study 33 | 120 | PROBABLY HIGH | PROBABLY LOW  | LOW           | PROBABLY HIGH | PROBABLY HIGH | PROBABLY LOW  | HIGH          | LOW           |
| Study 34_Reviewer 1 | Study 34 | 120 | HIGH          | LOW           | LOW           | HIGH          | HIGH          | LOW           | PROBABLY HIGH | PROBABLY HIGH |
| Study 34_Reviewer 2 | Study 34 | 120 | HIGH          | LOW           | LOW           | HIGH          | HIGH          | LOW           | PROBABLY HIGH | PROBABLY HIGH |
| Study 35_Reviewer 1 | Study 35 | 29  | HIGH          | LOW           | PROBABLY LOW  | PROBABLY LOW  | PROBABLY LOW  | LOW           | NOT REPORTED  | LOW           |
| Study 35_Reviewer 2 | Study 35 | 26  | NOT REPORTED  | LOW           | LOW           | LOW           | PROBABLY LOW  | PROBABLY LOW  | NOT REPORTED  | LOW           |
| Study 36_Reviewer 1 | Study 36 | 120 | PROBABLY HIGH | LOW           | LOW           | LOW           | LOW           | PROBABLY LOW  | LOW           | LOW           |
| Study 36_Reviewer 2 | Study 36 | 180 | PROBABLY HIGH | LOW           | LOW           | LOW           | LOW           | PROBABLY LOW  | LOW           | LOW           |
| Study 37_Reviewer 1 | Study 37 | 31  | PROBABLY HIGH | LOW           | LOW           | HIGH          | LOW           | NOT REPORTED  |               | UNCLEAR       |
| Study 37_Reviewer 2 | Study 37 | 25  | HIGH          | PROBABLY HIGH | PROBABLY LOW  | PROBABLY HIGH | PROBABLY LOW  | HIGH          | NOT REPORTED  | NOT REPORTED  |
| Study 38_Reviewer 1 | Study 38 | 30  | PROBABLY LOW  | PROBABLY LOW  | LOW           | PROBABLY LOW  | LOW           | LOW           | LOW           | PROBABLY LOW  |
| Study 38_Reviewer 2 | Study 38 | 50  | PROBABLY HIGH | HIGH          | PROBABLY HIGH | PROBABLY LOW  | LOW           | LOW           | HIGH          | LOW           |
| Study 39_Reviewer 1 | Study 39 | 13  | PROBABLY HIGH | LOW           | PROBABLY HIGH | LOW           | PROBABLY LOW  | LOW           | LOW           | LOW           |
| Study 39_Reviewer 2 | Study 39 | 30  | PROBABLY HIGH | PROBABLY LOW  | LOW           | LOW           | LOW           | PROBABLY LOW  | LOW           | PROBABLY LOW  |
| Study 40_Reviewer 1 | Study 40 | 27  | PROBABLY LOW  | PROBABLY LOW  | LOW           | LOW           | LOW           | PROBABLY LOW  |               |               |
| Study 40_Reviewer 2 | Study 40 | 35  | HIGH          | LOW           | HIGH          | PROBABLY HIGH | PROBABLY LOW  | NOT REPORTED  | LOW           | LOW           |
| Study 40_Reviewer 3 | Study 40 | 30  | NOT REPORTED  | LOW           | LOW           | LOW           | PROBABLY LOW  | PROBABLY LOW  | NOT REPORTED  | LOW           |
| Study 41_Reviewer 1 | Study 41 | 9   | HIGH          | PROBABLY LOW  | LOW           | LOW           | PROBABLY LOW  | PROBABLY LOW  | NOT REPORTED  |               |
| Study 41_Reviewer 2 | Study 41 | 72  | PROBABLY HIGH | LOW           | PROBABLY LOW  | PROBABLY LOW  | PROBABLY LOW  | LOW           | PROBABLY LOW  | PROBABLY HIGH |
| Study 42_Reviewer 1 | Study 42 | 13  | HIGH          | PROBABLY LOW  | LOW           | LOW           | PROBABLY LOW  | LOW           | NOT REPORTED  |               |
| Study 42_Reviewer 2 | Study 42 | 61  | HIGH          | LOW           | PROBABLY HIGH | PROBABLY LOW  | PROBABLY LOW  | LOW           | PROBABLY LOW  | PROBABLY HIGH |
| Study 43_Reviewer 1 | Study 43 | 46  | HIGH          | LOW           | LOW           | LOW           | PROBABLY LOW  | NOT REPORTED  | LOW           | LOW           |
| Study 43_Reviewer 2 | Study 43 | 26  | PROBABLY LOW  | LOW           | LOW           | LOW           | PROBABLY LOW  | PROBABLY LOW  | NOT REPORTED  | LOW           |
| Study 44_Reviewer 1 | Study 44 | 120 | PROBABLY HIGH | LOW           | LOW           | LOW           | LOW           | PROBABLY HIGH | LOW           | LOW           |
| Study 44_Reviewer 2 | Study 44 | 180 | PROBABLY HIGH | LOW           | LOW           | LOW           | LOW           | PROBABLY HIGH | LOW           | LOW           |



Strictly confidential – Do not share

|                     |          |     |               |               |               |               |               |              |               |               |
|---------------------|----------|-----|---------------|---------------|---------------|---------------|---------------|--------------|---------------|---------------|
| Study 68_Reviewer 1 | Study 68 | 120 | LOW           | PROBABLY LOW  | PROBABLY LOW  | PROBABLY HIGH | PROBABLY LOW  | PROBABLY LOW | PROBABLY LOW  | PROBABLY HIGH |
| Study 68_Reviewer 2 | Study 68 | 150 | LOW           | PROBABLY LOW  | PROBABLY LOW  | PROBABLY HIGH | PROBABLY LOW  | PROBABLY LOW | PROBABLY LOW  | PROBABLY HIGH |
| Study 69_Reviewer 1 | Study 69 | 120 | PROBABLY HIGH | HIGH          | PROBABLY LOW  | PROBABLY HIGH | PROBABLY HIGH | LOW          | PROBABLY HIGH | PROBABLY HIGH |
| Study 69_Reviewer 2 | Study 69 | 150 | PROBABLY HIGH | HIGH          | PROBABLY LOW  | PROBABLY HIGH | PROBABLY HIGH | LOW          | PROBABLY HIGH | PROBABLY HIGH |
| Study 70_Reviewer 1 | Study 70 | 90  | PROBABLY HIGH | PROBABLY HIGH | PROBABLY HIGH | PROBABLY LOW  | PROBABLY LOW  | HIGH         | PROBABLY LOW  | LOW           |
| Study 70_Reviewer 2 | Study 70 | 120 | PROBABLY HIGH | PROBABLY HIGH | PROBABLY HIGH | PROBABLY LOW  | PROBABLY LOW  | HIGH         | PROBABLY LOW  | LOW           |
| Study 71_Reviewer 1 | Study 71 | 39  | PROBABLY LOW  | LOW           | LOW           | PROBABLY LOW  | PROBABLY LOW  | LOW          |               |               |
| Study 71_Reviewer 2 | Study 71 | 30  | HIGH          | HIGH          | PROBABLY LOW  | PROBABLY HIGH | PROBABLY LOW  | HIGH         | LOW           | NOT REPORTED  |
| Study 72_Reviewer 1 | Study 72 | 37  | PROBABLY LOW  | PROBABLY LOW  | LOW           | LOW           | LOW           | LOW          | NOT REPORTED  |               |
| Study 72_Reviewer 2 | Study 72 | 25  | HIGH          | PROBABLY LOW  | LOW           | LOW           | PROBABLY LOW  | HIGH         | NOT REPORTED  | NOT REPORTED  |
| Study 73_Reviewer 1 | Study 73 | 180 | PROBABLY LOW  | LOW           | LOW           | LOW           | LOW           | PROBABLY LOW | LOW           | LOW           |
| Study 73_Reviewer 2 | Study 73 | 120 | PROBABLY LOW  | LOW           | LOW           | LOW           | LOW           | PROBABLY LOW | LOW           | LOW           |
| Study 74_Reviewer 1 | Study 74 |     | PROBABLY LOW  | PROBABLY LOW  | PROBABLY LOW  | LOW           | PROBABLY LOW  | LOW          | LOW           | PROBABLY LOW  |
| Study 74_Reviewer 2 | Study 74 |     | PROBABLY LOW  | LOW           | LOW           | LOW           | LOW           | LOW          | LOW           | LOW           |
| Study 75_Reviewer 1 | Study 75 | 180 | PROBABLY LOW  | PROBABLY LOW  | PROBABLY LOW  | PROBABLY LOW  | PROBABLY HIGH | PROBABLY LOW | PROBABLY LOW  | LOW           |
| Study 75_Reviewer 2 | Study 75 | 120 | PROBABLY LOW  | PROBABLY LOW  | PROBABLY LOW  | PROBABLY LOW  | PROBABLY HIGH | PROBABLY LOW | PROBABLY LOW  | LOW           |
| Study 76_Reviewer 1 | Study 76 | 150 | LOW           | PROBABLY LOW  | PROBABLY LOW  | PROBABLY LOW  | PROBABLY LOW  | PROBABLY LOW | PROBABLY LOW  | PROBABLY HIGH |
| Study 76_Reviewer 2 | Study 76 | 120 | LOW           | PROBABLY LOW  | PROBABLY LOW  | PROBABLY LOW  | PROBABLY LOW  | PROBABLY LOW | PROBABLY LOW  | PROBABLY HIGH |
| Study 77_Reviewer 1 | Study 77 | 47  | HIGH          | PROBABLY LOW  | LOW           | LOW           | PROBABLY LOW  | PROBABLY LOW | NOT REPORTED  |               |
| Study 77_Reviewer 2 | Study 77 | 30  | PROBABLY HIGH | PROBABLY LOW  | PROBABLY LOW  | NOT REPORTED  | PROBABLY LOW  | LOW          | NOT REPORTED  | NOT REPORTED  |
| Study 78_Reviewer 1 | Study 78 | 150 | PROBABLY LOW  | PROBABLY HIGH | PROBABLY LOW  | PROBABLY LOW  | PROBABLY HIGH | PROBABLY LOW | PROBABLY LOW  | PROBABLY HIGH |
| Study 78_Reviewer 2 | Study 78 | 120 | PROBABLY LOW  | PROBABLY HIGH | PROBABLY LOW  | PROBABLY LOW  | PROBABLY HIGH | PROBABLY LOW | PROBABLY LOW  | PROBABLY HIGH |
| Study 79_Reviewer 1 | Study 79 | 31  | PROBABLY HIGH | PROBABLY LOW  | LOW           | LOW           | PROBABLY LOW  | NOT REPORTED | NOT REPORTED  |               |
| Study 79_Reviewer 2 | Study 79 | 25  | PROBABLY HIGH | PROBABLY HIGH | LOW           | NOT REPORTED  | PROBABLY LOW  | HIGH         | LOW           | NOT REPORTED  |
| Study 80_Reviewer 1 | Study 80 | 150 | PROBABLY LOW  | PROBABLY LOW  | PROBABLY HIGH | PROBABLY LOW  | PROBABLY HIGH | PROBABLY LOW | PROBABLY LOW  | LOW           |
| Study 80_Reviewer 2 | Study 80 | 150 | PROBABLY LOW  | PROBABLY LOW  | PROBABLY HIGH | PROBABLY LOW  | PROBABLY HIGH | PROBABLY LOW | PROBABLY LOW  | LOW           |
| Study 81_Reviewer 1 | Study 81 | 36  | PROBABLY HIGH | PROBABLY HIGH | HIGH          | PROBABLY HIGH | PROBABLY HIGH | LOW          | PROBABLY LOW  | LOW           |
| Study 81_Reviewer 2 | Study 81 | 36  | PROBABLY LOW  | PROBABLY LOW  | LOW           | LOW           | PROBABLY LOW  | LOW          | PROBABLY LOW  | PROBABLY LOW  |
| Study 82_Reviewer 1 | Study 82 | 21  | HIGH          | LOW           | LOW           | LOW           | LOW           | LOW          | LOW           | LOW           |
| Study 82_Reviewer 2 | Study 82 | 24  | PROBABLY LOW  | LOW           | LOW           | LOW           | PROBABLY LOW  | LOW          | LOW           | PROBABLY LOW  |
| Study 83_Reviewer 1 | Study 83 | 25  | LOW           | PROBABLY LOW  | LOW           | LOW           | LOW           | LOW          | LOW           | LOW           |
| Study 83_Reviewer 2 | Study 83 | 34  | LOW           | LOW           | PROBABLY LOW  | LOW           | PROBABLY LOW  | PROBABLY LOW | LOW           | PROBABLY LOW  |
| Study 84_Reviewer 1 | Study 84 | 46  | PROBABLY HIGH | PROBABLY LOW  | LOW           | PROBABLY LOW  | NOT REPORTED  | PROBABLY LOW | NOT REPORTED  | LOW           |
| Study 84_Reviewer 2 | Study 84 | 20  | HIGH          | PROBABLY LOW  | LOW           | LOW           | PROBABLY LOW  | PROBABLY LOW | LOW           | LOW           |
| Study 85_Reviewer 1 | Study 85 | 41  | PROBABLY LOW  | LOW           | LOW           | PROBABLY LOW  | PROBABLY LOW  | LOW          | NOT REPORTED  | LOW           |
| Study 85_Reviewer 2 | Study 85 | 22  | HIGH          | PROBABLY LOW  | LOW           | PROBABLY LOW  | PROBABLY LOW  | PROBABLY LOW | PROBABLY HIGH | LOW           |
| Study 86_Reviewer 1 | Study 86 | 60  | LOW           | PROBABLY LOW  | PROBABLY LOW  | PROBABLY LOW  | PROBABLY LOW  | PROBABLY LOW | LOW           | LOW           |
| Study 86_Reviewer 2 | Study 86 | 17  | PROBABLY HIGH | LOW           | LOW           | PROBABLY LOW  | PROBABLY LOW  | LOW          | PROBABLY HIGH | LOW           |
| Study 87_Reviewer 1 | Study 87 | 60  | PROBABLY HIGH | LOW           | LOW           | PROBABLY LOW  | PROBABLY LOW  | LOW          | LOW           | LOW           |
| Study 87_Reviewer 2 | Study 87 | 15  | NOT REPORTED  | PROBABLY LOW  | LOW           | PROBABLY LOW  | LOW           | PROBABLY LOW | NOT REPORTED  | LOW           |
| Study 88_Reviewer 1 | Study 88 | 22  | PROBABLY HIGH | PROBABLY HIGH | LOW           | PROBABLY HIGH | PROBABLY HIGH | PROBABLY LOW | NOT REPORTED  | LOW           |
| Study 88_Reviewer 2 | Study 88 |     | PROBABLY HIGH | PROBABLY LOW  | PROBABLY LOW  | PROBABLY HIGH | PROBABLY LOW  | PROBABLY LOW | PROBABLY HIGH | LOW           |
| Study 89_Reviewer 1 | Study 89 | 54  | PROBABLY LOW  | LOW           | LOW           | PROBABLY LOW  | PROBABLY LOW  | LOW          | LOW           | LOW           |
| Study 89_Reviewer 2 | Study 89 | 14  | NOT REPORTED  | PROBABLY LOW  | LOW           | PROBABLY LOW  | PROBABLY LOW  | PROBABLY LOW | NOT REPORTED  | LOW           |
| Study 90_Reviewer 1 | Study 90 | 20  | PROBABLY HIGH | PROBABLY LOW  | LOW           | PROBABLY HIGH | PROBABLY LOW  | LOW          | NOT REPORTED  | PROBABLY LOW  |
| Study 90_Reviewer 2 | Study 90 | 20  | HIGH          | PROBABLY LOW  | LOW           | PROBABLY HIGH | PROBABLY LOW  | PROBABLY LOW | PROBABLY HIGH | LOW           |



Strictly confidential – Do not share

|                      |           |     |               |               |               |               |               |               |               |               |
|----------------------|-----------|-----|---------------|---------------|---------------|---------------|---------------|---------------|---------------|---------------|
| Study 91_Reviewer 1  | Study 91  | 59  | PROBABLY HIGH | LOW           | LOW           | LOW           | PROBABLY LOW  | PROBABLY LOW  | LOW           | LOW           |
| Study 91_Reviewer 2  | Study 91  | 13  | HIGH          | PROBABLY LOW  | LOW           | PROBABLY LOW  | PROBABLY LOW  | PROBABLY HIGH | NOT REPORTED  | LOW           |
| Study 92_Reviewer 1  | Study 92  | 15  | NOT REPORTED  | PROBABLY LOW  | PROBABLY LOW  | PROBABLY LOW  | PROBABLY LOW  | PROBABLY HIGH | PROBABLY HIGH | LOW           |
| Study 92_Reviewer 2  | Study 92  | 15  | LOW           | PROBABLY LOW  | PROBABLY LOW  | PROBABLY HIGH | PROBABLY HIGH | PROBABLY LOW  | PROBABLY LOW  | LOW           |
| Study 93_Reviewer 1  | Study 93  | 70  | PROBABLY LOW  | LOW           | LOW           | PROBABLY LOW  | PROBABLY LOW  | PROBABLY LOW  | LOW           | LOW           |
| Study 93_Reviewer 2  | Study 93  | 18  | PROBABLY HIGH | PROBABLY LOW  | LOW           | NOT REPORTED  | PROBABLY LOW  | NOT REPORTED  | NOT REPORTED  | LOW           |
| Study 94_Reviewer 1  | Study 94  | 15  | HIGH          | PROBABLY LOW  | LOW           | NOT REPORTED  | NOT REPORTED  | PROBABLY LOW  | PROBABLY HIGH | LOW           |
| Study 94_Reviewer 2  | Study 94  |     | PROBABLY HIGH | PROBABLY LOW  | PROBABLY LOW  | PROBABLY HIGH | PROBABLY HIGH | PROBABLY LOW  | PROBABLY HIGH | LOW           |
| Study 95_Reviewer 1  | Study 95  | 28  | LOW           |
| Study 95_Reviewer 2  | Study 95  | 21  | PROBABLY HIGH | PROBABLY LOW  | LOW           | PROBABLY LOW  | PROBABLY LOW  | PROBABLY LOW  | PROBABLY HIGH | LOW           |
| Study 96_Reviewer 1  | Study 96  | 20  | LOW           | NOT REPORTED  | LOW           | NOT REPORTED  | LOW           | LOW           | NOT REPORTED  | NOT REPORTED  |
| Study 96_Reviewer 2  | Study 96  | 120 | LOW           | LOW           | LOW           | LOW           | PROBABLY LOW  | LOW           | PROBABLY LOW  | PROBABLY HIGH |
| Study 96_Reviewer 3  | Study 96  |     | PROBABLY HIGH | PROBABLY LOW  | PROBABLY HIGH | LOW           |
| Study 97_Reviewer 1  | Study 97  | 56  | PROBABLY HIGH | LOW           | LOW           | PROBABLY LOW  | PROBABLY LOW  | PROBABLY LOW  | NOT REPORTED  | LOW           |
| Study 97_Reviewer 2  | Study 97  | 24  | PROBABLY LOW  | LOW           | LOW           | LOW           | LOW           | LOW           | LOW           | LOW           |
| Study 98_Reviewer 1  | Study 98  | 16  | PROBABLY LOW  | LOW           | LOW           | LOW           | LOW           | LOW           | LOW           | LOW           |
| Study 98_Reviewer 2  | Study 98  | 23  | PROBABLY HIGH | PROBABLY LOW  | LOW           | PROBABLY LOW  | PROBABLY LOW  | NOT REPORTED  | PROBABLY HIGH | LOW           |
| Study 99_Reviewer 1  | Study 99  | 10  | LOW           |
| Study 99_Reviewer 2  | Study 99  | 15  | PROBABLY LOW  | LOW           |
| Study 100_Reviewer 1 | Study 100 | 53  | PROBABLY LOW  | LOW           | LOW           | PROBABLY LOW  | PROBABLY LOW  | PROBABLY LOW  | NOT REPORTED  | LOW           |
| Study 100_Reviewer 2 | Study 100 | 12  | LOW           |
| Study 101_Reviewer 1 | Study 101 | 11  | LOW           |
| Study 101_Reviewer 2 | Study 101 | 20  | PROBABLY HIGH | PROBABLY HIGH | PROBABLY LOW  | PROBABLY HIGH |               | PROBABLY HIGH | PROBABLY HIGH | LOW           |
| Study 102_Reviewer 1 | Study 102 | 20  | PROBABLY HIGH | PROBABLY LOW  | LOW           | PROBABLY LOW  | PROBABLY HIGH | PROBABLY LOW  | NOT REPORTED  | PROBABLY HIGH |
| Study 102_Reviewer 2 | Study 102 | 20  | HIGH          | PROBABLY LOW  | LOW           | PROBABLY LOW  | PROBABLY LOW  | NOT REPORTED  | PROBABLY HIGH | LOW           |
| Study 103_Reviewer 1 | Study 103 | 18  | LOW           | PROBABLY LOW  | LOW           | LOW           | LOW           | LOW           | NOT REPORTED  | LOW           |
| Study 103_Reviewer 2 | Study 103 | 15  | PROBABLY LOW  | PROBABLY LOW  | PROBABLY LOW  | NOT REPORTED  | PROBABLY LOW  | PROBABLY LOW  | PROBABLY LOW  | LOW           |
| Study 104_Reviewer 1 | Study 104 | 55  | PROBABLY LOW  | LOW           | PROBABLY LOW  | LOW           | PROBABLY LOW  | PROBABLY LOW  | NOT REPORTED  | LOW           |
| Study 104_Reviewer 2 | Study 104 | 27  | PROBABLY HIGH | PROBABLY LOW  | LOW           |
| Study 105_Reviewer 1 | Study 105 | 10  | LOW           |
| Study 105_Reviewer 2 | Study 105 | 23  | PROBABLY HIGH | PROBABLY LOW  | LOW           | PROBABLY LOW  | PROBABLY LOW  | NOT REPORTED  | PROBABLY HIGH | LOW           |
| Study 106_Reviewer 1 | Study 106 | 33  | PROBABLY HIGH | PROBABLY LOW  | PROBABLY HIGH | PROBABLY HIGH | PROBABLY HIGH | PROBABLY HIGH | NOT REPORTED  | LOW           |
| Study 106_Reviewer 2 | Study 106 | 15  | PROBABLY LOW  | LOW           | LOW           |
| Study 107_Reviewer 1 | Study 107 | 69  | PROBABLY LOW  | LOW           | LOW           | PROBABLY LOW  | PROBABLY LOW  | PROBABLY LOW  | PROBABLY LOW  | LOW           |
| Study 107_Reviewer 2 | Study 107 | 30  | LOW           | NOT REPORTED  | LOW           | LOW           | LOW           | LOW           | NOT REPORTED  | NOT REPORTED  |
| Study 108_Reviewer 1 | Study 108 | 10  | HIGH          | NOT REPORTED  | NOT REPORTED  | NOT REPORTED  | NOT REPORTED  | LOW           | NOT REPORTED  | NOT REPORTED  |
| Study 108_Reviewer 2 | Study 108 | 19  | HIGH          | PROBABLY LOW  | LOW           | PROBABLY LOW  | PROBABLY LOW  | NOT REPORTED  | PROBABLY HIGH | LOW           |
| Study 109_Reviewer 1 | Study 109 | 30  | PROBABLY LOW  | PROBABLY HIGH | LOW           | PROBABLY HIGH | NOT REPORTED  | PROBABLY HIGH | NOT REPORTED  | NOT REPORTED  |
| Study 109_Reviewer 2 | Study 109 | 15  | PROBABLY LOW  | LOW           | PROBABLY LOW  | LOW           | PROBABLY LOW  | PROBABLY LOW  | PROBABLY LOW  | LOW           |
| Study 110_Reviewer 1 | Study 110 | 52  | LOW           | LOW           | LOW           | LOW           | PROBABLY LOW  | PROBABLY HIGH | LOW           | LOW           |
| Study 110_Reviewer 2 | Study 110 | 19  | LOW           | LOW           | PROBABLY LOW  | PROBABLY LOW  | LOW           | LOW           | LOW           | LOW           |
| Study 111_Reviewer 1 | Study 111 | 16  | PROBABLY HIGH | NOT REPORTED  | NOT REPORTED  | NOT REPORTED  | NOT REPORTED  | LOW           | PROBABLY HIGH | LOW           |
| Study 111_Reviewer 2 | Study 111 | 45  | PROBABLY LOW  | NOT REPORTED  | LOW           | PROBABLY LOW  | PROBABLY HIGH | NOT REPORTED  | NOT REPORTED  | NOT REPORTED  |
| Study 112_Reviewer 1 | Study 112 | 23  | PROBABLY HIGH | PROBABLY LOW  | PROBABLY HIGH | PROBABLY HIGH | PROBABLY LOW  | LOW           | PROBABLY LOW  | LOW           |
| Study 112_Reviewer 2 | Study 112 | 26  | PROBABLY LOW  | PROBABLY LOW  | LOW           | LOW           | PROBABLY LOW  | PROBABLY LOW  | NOT REPORTED  | LOW           |
| Study 113_Reviewer 1 | Study 113 | 13  | LOW           | LOW           | LOW           | LOW           | LOW           | LOW           | PROBABLY HIGH | LOW           |

Strictly confidential – Do not share

|                      |           |    |               |               |               |               |               |               |               |               |
|----------------------|-----------|----|---------------|---------------|---------------|---------------|---------------|---------------|---------------|---------------|
| Study 113_Reviewer 2 | Study 113 | 43 | LOW           | NOT REPORTED  | LOW           | PROBABLY LOW  | LOW           | LOW           | NOT REPORTED  | NOT REPORTED  |
| Study 113_Reviewer 3 | Study 113 | 20 | PROBABLY HIGH | PROBABLY LOW  | LOW           | PROBABLY LOW  | PROBABLY LOW  | NOT REPORTED  | PROBABLY HIGH | LOW           |
| Study 114_Reviewer 1 | Study 114 | 15 | PROBABLY HIGH | PROBABLY LOW  | LOW           | LOW           | PROBABLY LOW  | PROBABLY LOW  | NOT REPORTED  | LOW           |
| Study 114_Reviewer 2 | Study 114 | 26 | PROBABLY LOW  | PROBABLY LOW  | LOW           | PROBABLY LOW  | LOW           | PROBABLY LOW  | PROBABLY LOW  | LOW           |
| Study 114_Reviewer 3 | Study 114 | 23 | HIGH          | PROBABLY LOW  | LOW           | HIGH          | PROBABLY LOW  | PROBABLY LOW  | PROBABLY HIGH | LOW           |
| Study 115_Reviewer 1 | Study 115 | 15 | LOW           | LOW           | LOW           | LOW           | LOW           | NOT REPORTED  | NOT REPORTED  | NOT REPORTED  |
| Study 115_Reviewer 2 | Study 115 | 49 | PROBABLY HIGH | NOT REPORTED  | PROBABLY HIGH | PROBABLY HIGH | NOT REPORTED  | LOW           | NOT REPORTED  | NOT REPORTED  |
| Study 116_Reviewer 1 | Study 116 | 15 | NOT REPORTED  | PROBABLY HIGH | LOW           | NOT REPORTED  | NOT REPORTED  | LOW           | NOT REPORTED  | NOT REPORTED  |
| Study 116_Reviewer 2 | Study 116 | 41 | LOW           | NOT REPORTED  | LOW           | LOW           | LOW           | LOW           | NOT REPORTED  | LOW           |
| Study 117_Reviewer 1 | Study 117 | 42 | PROBABLY LOW  | LOW           | LOW           | PROBABLY LOW  | PROBABLY LOW  | LOW           | LOW           | LOW           |
| Study 117_Reviewer 2 | Study 117 | 15 | LOW           | NOT REPORTED  | LOW           | LOW           | LOW           | LOW           | NOT REPORTED  | NOT REPORTED  |
| Study 117_Reviewer 3 | Study 117 | 40 | LOW           | PROBABLY LOW  | LOW           | LOW           | PROBABLY LOW  | LOW           | PROBABLY HIGH | PROBABLY HIGH |
| Study 118_Reviewer 1 | Study 118 | 40 | PROBABLY LOW  | LOW           | LOW           | LOW           | PROBABLY LOW  | PROBABLY LOW  | LOW           | LOW           |
| Study 118_Reviewer 2 | Study 118 | 25 | PROBABLY HIGH | NOT REPORTED  |
| Study 119_Reviewer 1 | Study 119 | 15 | LOW           | LOW           | LOW           | LOW           | PROBABLY LOW  | PROBABLY LOW  | NOT REPORTED  | NOT REPORTED  |
| Study 119_Reviewer 2 | Study 119 | 15 |               | PROBABLY LOW  | LOW           |
| Study 120_Reviewer 1 | Study 120 | 20 | HIGH          | NOT REPORTED  | NOT REPORTED  | NOT REPORTED  | PROBABLY HIGH | LOW           | NOT REPORTED  | NOT REPORTED  |
| Study 120_Reviewer 2 | Study 120 | 25 | PROBABLY HIGH | PROBABLY LOW  | PROBABLY HIGH | PROBABLY LOW  | PROBABLY LOW  | LOW           | PROBABLY LOW  | LOW           |
| Study 121_Reviewer 1 | Study 121 | 26 | PROBABLY LOW  | LOW           | PROBABLY LOW  | LOW           | LOW           | LOW           | LOW           | LOW           |
| Study 121_Reviewer 2 | Study 121 | 90 | NOT REPORTED  | PROBABLY HIGH | PROBABLY HIGH | NOT REPORTED  | NOT REPORTED  | LOW           | NOT REPORTED  | NOT REPORTED  |
| Study 122_Reviewer 1 | Study 122 | 12 | LOW           |
| Study 122_Reviewer 2 | Study 122 | 30 | PROBABLY LOW  | NOT REPORTED  | LOW           | PROBABLY HIGH | PROBABLY LOW  | LOW           | NOT REPORTED  | NOT REPORTED  |
| Study 122_Reviewer 3 | Study 122 | 22 | PROBABLY HIGH | PROBABLY LOW  | LOW           | PROBABLY LOW  | PROBABLY LOW  | LOW           | PROBABLY HIGH | LOW           |
| Study 123_Reviewer 1 | Study 123 | 15 | PROBABLY LOW  | PROBABLY LOW  | PROBABLY LOW  | LOW           | LOW           | LOW           | NOT REPORTED  | NOT REPORTED  |
| Study 123_Reviewer 2 | Study 123 | 20 | PROBABLY LOW  | NOT REPORTED  | PROBABLY LOW  | PROBABLY LOW  | PROBABLY LOW  | NOT REPORTED  | PROBABLY HIGH | LOW           |
| Study 124_Reviewer 1 | Study 124 | 18 | LOW           | LOW           | LOW           | LOW           | PROBABLY LOW  | LOW           | LOW           | PROBABLY LOW  |
| Study 124_Reviewer 2 | Study 124 | 40 | LOW           | PROBABLY LOW  | PROBABLY HIGH | PROBABLY LOW  | NOT REPORTED  | NOT REPORTED  | NOT REPORTED  | NOT REPORTED  |
| Study 124_Reviewer 3 | Study 124 | 15 | PROBABLY LOW  | NOT REPORTED  | PROBABLY LOW  | NOT REPORTED  | NOT REPORTED  | PROBABLY LOW  | PROBABLY HIGH | LOW           |
| Study 125_Reviewer 1 | Study 125 | 10 | PROBABLY LOW  | PROBABLY LOW  | NOT REPORTED  | NOT REPORTED  | NOT REPORTED  | PROBABLY HIGH | NOT REPORTED  | NOT REPORTED  |
| Study 125_Reviewer 2 | Study 125 | 17 | PROBABLY HIGH | LOW           | PROBABLY HIGH | NOT REPORTED  | NOT REPORTED  | LOW           | NOT REPORTED  | LOW           |
| Study 126_Reviewer 1 | Study 126 | 14 | LOW           | LOW           | LOW           | LOW           | LOW           | PROBABLY LOW  | LOW           | PROBABLY LOW  |
| Study 126_Reviewer 2 | Study 126 | 74 | PROBABLY LOW  | PROBABLY LOW  | LOW           | LOW           | PROBABLY HIGH | PROBABLY HIGH | LOW           | PROBABLY LOW  |
| Study 127_Reviewer 1 | Study 127 | 10 | PROBABLY LOW  | PROBABLY LOW  | LOW           | PROBABLY LOW  | LOW           | PROBABLY LOW  | LOW           | PROBABLY LOW  |
| Study 127_Reviewer 2 | Study 127 | 58 | LOW           | LOW           | LOW           | NOT REPORTED  | NOT REPORTED  | LOW           | NOT REPORTED  | PROBABLY HIGH |
| Study 128_Reviewer 1 | Study 128 | 16 | HIGH          | LOW           | LOW           | LOW           | LOW           | HIGH          | NOT REPORTED  | LOW           |
| Study 128_Reviewer 2 | Study 128 | 20 | HIGH          | PROBABLY LOW  | LOW           | PROBABLY LOW  | PROBABLY LOW  | NOT REPORTED  | PROBABLY HIGH | LOW           |
| Study 129_Reviewer 1 | Study 129 | 12 | LOW           | PROBABLY LOW  | LOW           | LOW           | LOW           | PROBABLY LOW  | LOW           | LOW           |
| Study 129_Reviewer 2 | Study 129 | 53 | LOW           | PROBABLY LOW  | LOW           | NOT REPORTED  | NOT REPORTED  | NOT REPORTED  | NOT REPORTED  | PROBABLY HIGH |
| Study 130_Reviewer 1 | Study 130 | 14 | LOW           | PROBABLY LOW  | LOW           | LOW           | LOW           | PROBABLY LOW  | PROBABLY LOW  | LOW           |
| Study 130_Reviewer 2 | Study 130 | 40 | LOW           | LOW           | PROBABLY LOW  | LOW           | LOW           | LOW           | LOW           | PROBABLY HIGH |
| Study 130_Reviewer 3 | Study 130 | 22 | PROBABLY HIGH | PROBABLY LOW  | PROBABLY HIGH | PROBABLY LOW  | PROBABLY LOW  | PROBABLY HIGH | PROBABLY HIGH | LOW           |
| Study 131_Reviewer 1 | Study 131 | 28 | PROBABLY LOW  | PROBABLY LOW  | PROBABLY LOW  | PROBABLY LOW  | PROBABLY HIGH | PROBABLY LOW  | PROBABLY LOW  | NOT REPORTED  |
| Study 131_Reviewer 2 | Study 131 |    | LOW           | NOT REPORTED  | LOW           | LOW           | LOW           | NOT REPORTED  | NOT REPORTED  | NOT REPORTED  |
| Study 132_Reviewer 1 | Study 132 | 8  | LOW           | LOW           | LOW           | LOW           | LOW           | PROBABLY LOW  | LOW           | LOW           |
| Study 132_Reviewer 2 | Study 132 | 41 | LOW           |
| Study 133_Reviewer 1 | Study 133 | 12 | PROBABLY LOW  | PROBABLY LOW  | PROBABLY LOW  | LOW           | PROBABLY LOW  | LOW           | LOW           | LOW           |

Strictly confidential – Do not share

|                      |           |    |               |              |               |              |               |              |               |               |
|----------------------|-----------|----|---------------|--------------|---------------|--------------|---------------|--------------|---------------|---------------|
| Study 133_Reviewer 2 | Study 133 | 15 | PROBABLY LOW  | PROBABLY LOW | PROBABLY HIGH | NOT REPORTED | PROBABLY HIGH | PROBABLY LOW | PROBABLY HIGH | LOW           |
| Study 134_Reviewer 1 | Study 134 | 11 | LOW           | LOW          | LOW           | LOW          | LOW           | PROBABLY LOW | LOW           | LOW           |
| Study 134_Reviewer 2 | Study 134 | 60 | PROBABLY HIGH | PROBABLY LOW | PROBABLY HIGH | LOW          | LOW           | NOT REPORTED | LOW           | PROBABLY HIGH |
| Study 135_Reviewer 1 | Study 135 | 11 | PROBABLY LOW  | PROBABLY LOW | LOW           | LOW          | LOW           | LOW          | LOW           | LOW           |
| Study 135_Reviewer 2 | Study 135 | 15 | LOW           | LOW          | PROBABLY LOW  | NOT REPORTED | PROBABLY LOW  | PROBABLY LOW | PROBABLY HIGH | LOW           |
| Study 136_Reviewer 1 | Study 136 | 11 | PROBABLY LOW  | PROBABLY LOW | LOW           | LOW          | LOW           | LOW          | LOW           | LOW           |
| Study 136_Reviewer 2 | Study 136 | 40 | LOW           | PROBABLY LOW | LOW           | LOW          | PROBABLY LOW  | LOW          | LOW           | PROBABLY LOW  |
| Study 137_Reviewer 1 | Study 137 | 23 | HIGH          | PROBABLY LOW | LOW           | PROBABLY LOW | PROBABLY LOW  | PROBABLY LOW | PROBABLY HIGH | LOW           |
| Study 137_Reviewer 2 | Study 137 | 14 | LOW           | PROBABLY LOW | PROBABLY LOW  | LOW          | LOW           | LOW          | LOW           | LOW           |
| Study 137_Reviewer 3 | Study 137 | 50 | LOW           | PROBABLY LOW | PROBABLY LOW  | LOW          | PROBABLY LOW  | LOW          | NOT REPORTED  | PROBABLY HIGH |
